# Supplementary material for: Unintentional injuries among children in resource poor settings: where do the fingers point?
Source: HighWire-hosted journal article supplement (doi:10.1136/archdischild-2011-300589), 2011-09-26
Supplement: archdischild-2011-300589_ds2.pdf [file archdischild-2011-300589_ds2.pdf]

**Picture 1: Uncovered manholes on pedestrian walk spaces in India**

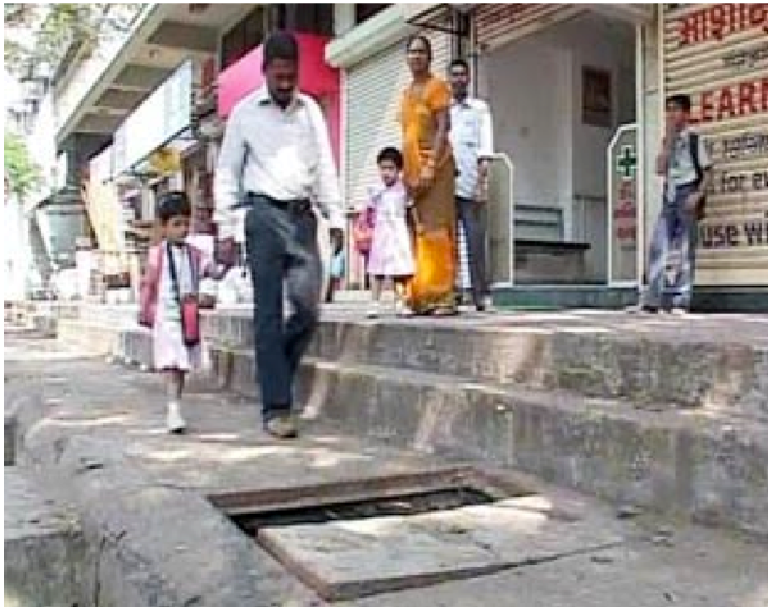

Source: <http://ibnlive.in.com/news/3yroid-falls-into-manhole-remains-untraced/107521-3.html> (downloaded on 21 July 2011)
